# Supplementary material
Source: Springer Nature journal article supplement (https://www.springermedizin.de/resource/supplementary/12885_2008_1532_MOESM7_ESM.pdf/9472252)

# Additional file 7.

**a**

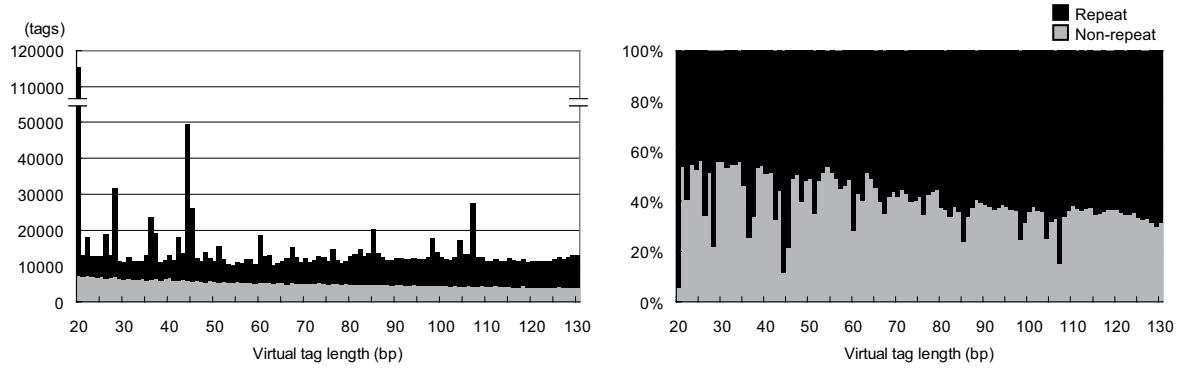

**b**

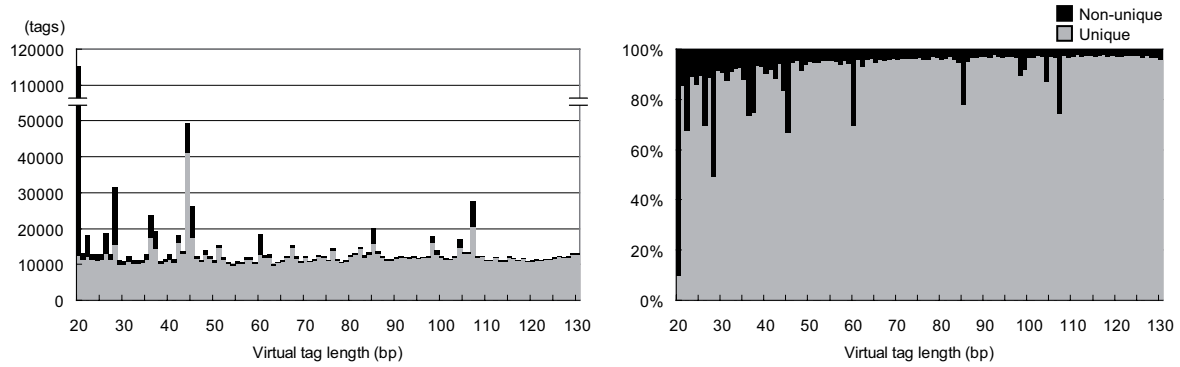

**c**

| 20 - 130 bp | tags (%)           | Unique           | Non-unique          | sub total |
|-------------|--------------------|------------------|---------------------|-----------|
| Repeat      | 810 664 ( 50.7 )   | 224 201 ( 14.0 ) | 1 034 865 ( 64.7 )  |           |
| Non-repeat  | 540 155 ( 33.8 )   | 25 229 ( 1.6 )   | 565 384 ( 35.3 )    |           |
| sub total   | 1 350 819 ( 84.4 ) | 249 430 ( 15.6 ) | 1 600 249 ( 100.0 ) |           |

  

| 30 - 60 bp | tags (%)         | Unique          | Non-unique        | sub total |
|------------|------------------|-----------------|-------------------|-----------|
| Repeat     | 224 380 ( 49.8 ) | 45 775 ( 10.2 ) | 270 155 ( 60.0 )  |           |
| Non-repeat | 169 941 ( 37.7 ) | 10 252 ( 2.3 )  | 180 193 ( 40.0 )  |           |
| sub total  | 394 321 ( 87.6 ) | 56 027 ( 12.4 ) | 450 348 ( 100.0 ) |           |

**d**

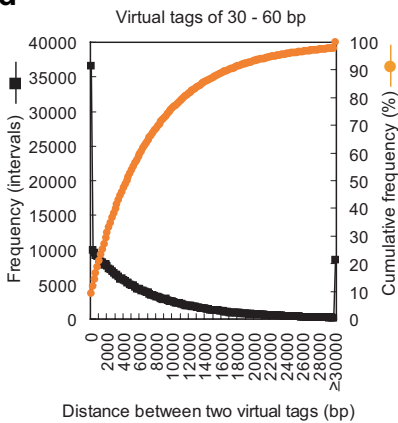

**e**

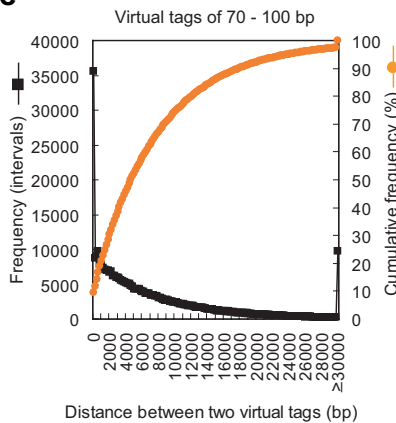

**f**

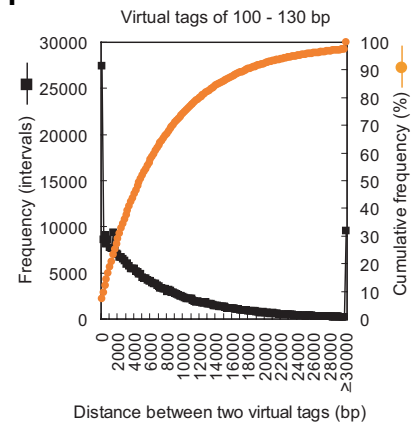

**g**

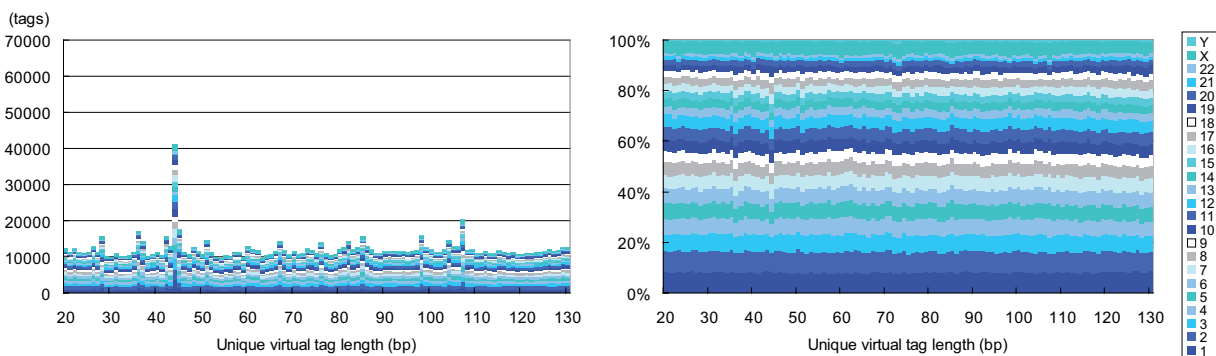

Supplement: MOESM7 [file 9472252]
